# Supplementary material
Source: publisher figshare collection journal article supplement (https://brill.figshare.com/articles/dataset/_/26404171)
Supplement: Supplementary file 1 [file 1]

| CL # | v+ln +cl. type       | 1. YHWH<br>(62 clauses; 69 roles) | 2. Israel, Judah<br>(128 clauses; 156 roles) | 3 Place/Time<br>(26 clauses; 27 roles) | 4 Work/Gain 50<br>(25/25)         | 5 Econ, SocPoli,<br>Status 53 (28/25) | 6 Judgm't,<br>Destr'ctn 82<br>(44/38) | 7 Relate, (dis)<br>ass'n 65 (30/35) | 8 Right'nss, Life<br>62 (26/36) | 9 Sin 41 (22/19)      | 10 Cult 35<br>(15/20) | 11 Feel, think 37<br>(18/19) | 12 Comme'n 23<br>(16/7) | 13 Nature 70<br>(22/48) |
|------|----------------------|-----------------------------------|----------------------------------------------|----------------------------------------|-----------------------------------|---------------------------------------|---------------------------------------|-------------------------------------|---------------------------------|-----------------------|-----------------------|------------------------------|-------------------------|-------------------------|
| 1    | 12:1a<br>(ZQtX)      | [me]<br>Goal                      | Ephraim<br>Actor                             |                                        |                                   |                                       | deceit<br>Cr-Q                        |                                     |                                 | surrounds<br>Mt-A ~10 |                       |                              |                         |                         |
| 2    | 12:1b<br>(Ellp)      | {Goal}                            | house of Israel<br>Actor                     |                                        |                                   |                                       | treachery<br>Cr-Q                     |                                     |                                 | {Mt-A ~10}            |                       |                              |                         |                         |
| 3    | 12:1c<br>(WXPtcp)    | God<br>Cr-Acc                     | Judah<br>Actor                               |                                        |                                   |                                       | still wandering<br>Mt-A, Cr-D         |                                     |                                 |                       |                       |                              |                         |                         |
| 4    | 12:1d<br>(WxPtcp)    | the-Holy {one}<br>Cr-Acc          | {Carrier}                                    |                                        |                                   |                                       | faithful<br>Rel-A.Atb                 |                                     |                                 |                       |                       |                              |                         |                         |
| 5    | 12:2a<br>(XPtcp)     |                                   | Ephraim<br>Actor                             |                                        | shepherding<br>Mt-A ~9, 10        |                                       |                                       |                                     |                                 |                       |                       |                              |                         | wind<br>Goal ~10 ~6     |
| 6    | 12:2b<br>(WPtcp)     |                                   | [he]<br>[Actor]                              |                                        | pursuing all day<br>Mt-A, Cr-D ~9 |                                       |                                       |                                     |                                 |                       |                       |                              |                         | east wind<br>Goal ~6    |
| 7    | 12:2c<br>(xYq0-L)    |                                   | [he]<br>[Actor]                              |                                        | multiplies<br>Mt-A ~9             |                                       | destruction<br>Goal                   | falsehood<br>Goal ~9                |                                 |                       |                       |                              |                         |                         |
| 8    | 12:2d<br>(WxY0-L)    |                                   | [they]<br>[Actor]                            |                                        |                                   | Assyria<br>Cr-Comit ~6                |                                       | make covenant<br>Mt-A, Goal         |                                 |                       |                       |                              |                         |                         |
| 9    | 12:2e<br>(WXYq-L)    |                                   | <by them><br><Agent>                         | Egypt<br>Cr-L                          |                                   | oil<br>Actor ~4, 13                   |                                       | carried<br>Mt-A ~4                  |                                 |                       |                       |                              |                         |                         |
| 10   | 12:3a<br>(WNmCl)     | is of.YHWH<br>Rel-I -ldr          | against Judah<br>Ben-Icm                     |                                        |                                   |                                       | dispute<br>ldd                        |                                     |                                 |                       |                       |                              |                         |                         |
| 11   | 12:3b<br>(Co[InfC]†) | {Actor}                           | Jacob -his<br>Goal -Atb-Pos                  |                                        |                                   |                                       | punish<br>Mt-A                        |                                     |                                 | ways<br>Cr-Q/Reas     |                       |                              |                         |                         |
| 12   | 12:3c<br>(xYq0-L)    | [he]<br>[Actor]                   | to-him -his<br>Goal -Atb-Pos                 |                                        |                                   |                                       | repays<br>Mt-A                        |                                     |                                 | deeds<br>Cr-Q/Reas    |                       |                              |                         |                         |
