# Supplementary material
Source: publisher figshare collection journal article supplement (https://brill.figshare.com/articles/dataset/_/26404171)
Supplement: Supplementary file 2 [file 1]

| CL # | v+ln +cl. type  | 1. YHWH<br>(62 clauses; 69 roles) | 2. Israel, Judah<br>(128 clauses; 156 roles) | 3 Place/Time<br>(26 clauses; 27 roles) | 4 Work/Gain 50<br>(25/25) | 5 Econ, SocPoli, Status 53 (28/25) | 6 Judgm't, Destr'ctn 82 (44/38) | 7 Relate, (dis) ass'n 65 (30/35) | 8 Right'nss, Life 62 (26/36) | 9 Sin 41 (22/19)               | 10 Cult 35 (15/20) | 11 Feel, think 37 (18/19)       | 12 Comme'n 23 (16/7) | 13 Nature 70 (22/48) |
|------|-----------------|-----------------------------------|----------------------------------------------|----------------------------------------|---------------------------|------------------------------------|---------------------------------|----------------------------------|------------------------------|--------------------------------|--------------------|---------------------------------|----------------------|----------------------|
| 75   | 13:5a/b (XQtI)  | I<br>Sensor                       | you<br>[Phenom]                              | in wilderness, droug<br>Cr-L, Cr-Q ≈6  |                           |                                    |                                 | know<br>Mn-C ~11                 |                              |                                |                    |                                 |                      |                      |
| 76   | 13:6a76 (CpenI) |                                   | -their<br>-Atb-Ps                            |                                        |                           | their pasturage<br>[Cr-Reas ≈13]   |                                 |                                  |                              |                                |                    |                                 |                      |                      |
| 77   | 13:6a77 (Way0)  |                                   | [they]<br>[Sensor]                           |                                        |                           |                                    |                                 |                                  |                              |                                |                    | were satisfied<br>Mn-Emo ~5     |                      |                      |
| 78   | 13:6b78 (ZQt0)  |                                   | [they]<br>[Sensor]                           |                                        |                           |                                    |                                 |                                  |                              |                                |                    | be(came) satisfied<br>Mn-Emo ~5 |                      |                      |
| 79   | 13:6b79 (WayX)  |                                   | -their<br>-Atb-Ps                            |                                        |                           |                                    |                                 |                                  |                              | be(came) haughty<br>Rel-A. Atb |                    | heart<br>Carrier                |                      |                      |
| 80   | 13:6c (xQt0)    | [me]<br>[Phenom]                  | [they]<br>[Sensor]                           |                                        |                           |                                    | forgot<br>Mn-C ~11              |                                  |                              |                                |                    |                                 |                      |                      |
