# Supplementary material
Source: publisher figshare collection journal article supplement (https://brill.figshare.com/articles/dataset/_/26404171)
Supplement: Supplementary file 3 [file 1]

| CL # | v+ln +cl. type        | 1. YHWH (62 clauses; 69 roles) | 2. Israel, Judah (128 clauses; 156 roles) | 3 Place/Time (26 clauses; 27 roles) | 4 Work/Gain 50 (25/25) | 5 Econ, SocPoli, Status 53 (28/25) | 6 Judgm't, Destr'ctn 82 (44/38) | 7 Relate, (dis) ass'n 65 (30/35) | 8 Right'nss, Life 62 (26/36) | 9 Sin 41 (22/19)       | 10 Cult 35 (15/20) | 11 Feel, think 37 (18/19) | 12 Comme'n 23 (16/7) | 13 Nature 70 (22/48) |
|------|-----------------------|--------------------------------|-------------------------------------------|-------------------------------------|------------------------|------------------------------------|---------------------------------|----------------------------------|------------------------------|------------------------|--------------------|---------------------------|----------------------|----------------------|
| 115  | 14:1a (ZYqX)          |                                | Samaria Carrier                           |                                     |                        |                                    |                                 |                                  |                              | is guilty<br>Rel-A.Atb |                    |                           |                      |                      |
| 116  | 14:1b (xQt0)          | against God<br>Ben-Icm         | [she] -her<br>[Actor] -Atb-Ps             |                                     |                        |                                    |                                 | rebelled<br>Mt-A ≈9              |                              |                        |                    |                           |                      |                      |
| 117  | 14:1c (xYq0-L)        |                                | [they]<br>[Actor]                         |                                     |                        |                                    | fall by-sword<br>Mt-A, Cr-Mns   |                                  |                              |                        |                    |                           |                      |                      |
| 118  | 14:1d (XYqt-L)        |                                | -their<br>-Atb-Ps                         |                                     |                        | children<br>Goal ≈2                | be smashed<br>Mt-A              |                                  |                              |                        |                    |                           |                      |                      |
| 119  | 14:1e (WXYq-L)        |                                | their<br>-Atb-Ps                          |                                     |                        | pregnant women<br>Goal ≈2          | be ripped open<br>Mt-A          |                                  |                              |                        |                    |                           |                      |                      |
| 120  | 14:2a120 (Zlm0)       | {Sayer}                        | {Rcvr}                                    |                                     |                        |                                    |                                 | return<br>"Mt-A                  |                              |                        |                    |                           |                      |                      |
| 121  | 14:2a121 (Voctf)      |                                | O Israel<br>"Rcvr}                        |                                     |                        |                                    |                                 |                                  |                              |                        |                    |                           |                      |                      |
| 122  | 14:2a122 (aj[PP]†120) | to/until YH God<br>"Cr-AL      | -your<br>"-Atb-Ps                         |                                     |                        |                                    |                                 |                                  |                              |                        |                    |                           |                      |                      |
| 123  | 14:2b (xQt0)          |                                | [you] -your<br>"[Actor]" -Atb-Ps          |                                     |                        |                                    | stumble<br>"Mt-A                |                                  |                              | iniquity<br>"Cr-Reas   |                    |                           |                      |                      |
