# Supplementary material
Source: publisher figshare collection journal article supplement (https://brill.figshare.com/articles/dataset/_/26404171)
Supplement: Supplementary file 4 [file 1]

| CL # | v+ln +cl. type   | 1. YHWH (62 clauses; 69 roles) | 2. Israel, Judah (128 clauses; 156 roles) | 3 Place/Time (26 clauses; 27 roles) | 4 Work/Gain 50 (25/25)       | 5 Econ, SocPoli, Status 53 (28/25) | 6 Judgm't, Destr'ctn 82 (44/38) | 7 Relate, (dis) ass'n 65 (30/35) | 8 Right'nss, Life 62 (26/36) | 9 Sin 41 (22/19) | 10 Cult 35 (15/20) | 11 Feel, think 37 (18/19)             | 12 Comme'n 23 (16/7) | 13 Nature 70 (22/48)          |
|------|------------------|--------------------------------|-------------------------------------------|-------------------------------------|------------------------------|------------------------------------|---------------------------------|----------------------------------|------------------------------|------------------|--------------------|---------------------------------------|----------------------|-------------------------------|
| 66   | 13:3a (xYq0)     |                                | [they] [Carrier]                          |                                     |                              |                                    | be(come) Rel-A ≈13              |                                  |                              |                  |                    |                                       |                      | like morning cloud Atb-Cmp ≈6 |
| 67   | 13:3b67 (WxPtcp) |                                | {Carrier}                                 |                                     |                              |                                    | early {Rel-A} Cr-T ≈13          |                                  |                              |                  |                    |                                       |                      | like-dew Atb-Cmp ≈6           |
| 68   | 13:3b68 (Ptcp†)  |                                |                                           |                                     |                              |                                    | which disappears Mt-E† ≈13      |                                  |                              |                  |                    |                                       |                      |                               |
| 69   | 13:3c69 (Ellp)   |                                | {Carrier}                                 |                                     |                              |                                    | {Rel-A} ≈13                     |                                  |                              |                  |                    |                                       |                      | like-chaff Atb-Cmp ≈6         |
| 70   | 13:3c70 (ZYq0)   |                                |                                           |                                     | from threshing floor Cr-L ≈6 |                                    | blown [it] Mt-A [Actor] ≈13     |                                  |                              |                  |                    |                                       |                      |                               |
| 71   | 13:3d (Ellp)     |                                | {Actor}                                   |                                     | from a window Cr-L ≈6        |                                    | {Mt-A} ≈13                      |                                  |                              |                  |                    |                                       |                      | like-smoke Atb-Cmp ≈6         |
| 72   | 13:4a (WNmCl)    | {am} I YH God Rel-I, Idd, Idr  | -your -Atb-Ps                             | from land of Egypt Cr-L             |                              |                                    |                                 |                                  |                              |                  |                    |                                       |                      |                               |
| 73   | 13:4b (WxY0-L)   |                                | [you] [Sensor]                            |                                     |                              |                                    |                                 | not know Mn-C ~11                |                              |                  |                    | a god besides me Phenom ≠1            |                      |                               |
| 74   | 13:4c (WNmCl)    | except me Cr-Def               |                                           |                                     |                              |                                    |                                 |                                  |                              |                  |                    | is not deliverer Exist ≠1 Existent ≈5 |                      |                               |
