# Supplementary material
Source: publisher figshare collection journal article supplement (https://brill.figshare.com/articles/dataset/_/26404171)
Supplement: Supplementary file 5 [file 1]

| CL # | v+ln +cl. type | 1. YHWH<br>(62 clauses; 69 roles) | 2. Israel, Judah<br>(128 clauses; 156 roles) | 3 Place/Time<br>(26 clauses; 27 roles) | 4 Work/Gain 50<br>(25/25) | 5 Econ, SocPoli, Status 53 (28/25) | 6 Judgm't, Destr'ctn 82 (44/38) | 7 Relate, (dis) ass'n 65 (30/35) | 8 Right'nss, Life 62 (26/36) | 9 Sin 41 (22/19) | 10 Cult 35 (15/20) | 11 Feel, think 37 (18/19) | 12 Comme'n 23 (16/7) | 13 Nature 70 (22/48)              |
|------|----------------|-----------------------------------|----------------------------------------------|----------------------------------------|---------------------------|------------------------------------|---------------------------------|----------------------------------|------------------------------|------------------|--------------------|---------------------------|----------------------|-----------------------------------|
| 136  | 14:5a (ZYq0)   | [I]<br>[Actor]                    | -their<br>-Atb-Ps                            |                                        |                           |                                    |                                 |                                  | heal<br>Mt-A                 | apostasy<br>Goal |                    |                           |                      |                                   |
| 137  | 14:5b (ZYq0)   | [I]<br>[Actor]                    | [them]<br>[Goal]                             |                                        |                           |                                    |                                 | will love<br>Mt-A ≈8             |                              |                  |                    | freely<br>Cr-Q            |                      |                                   |
| 138  | 14:5c (xQtX)   | -my<br>-Atb-Ps                    | from-him<br>Cr-AL                            |                                        |                           |                                    |                                 | turn<br>Mt-A                     |                              |                  |                    | anger<br>Actor            |                      |                                   |
| 139  | 14:6a (ZYq0)   | [I]<br>[Carrier]                  | to Israel<br>Ben                             |                                        |                           |                                    |                                 |                                  | be like<br>Rel-A ≈13         |                  |                    |                           |                      | like-the dew<br>Atb-Cmp ≈8        |
| 140  | 14:6b (ZYq0)   |                                   | [he]<br>[Actor]                              |                                        |                           |                                    |                                 |                                  | blossom<br>Mt-A ≈13          |                  |                    |                           |                      | like-the lilly<br>Cr-Cmp ≈8       |
| 141  | 14:6c (WYq0)   |                                   | [he] -his<br>[Actor] -Atb-Ps                 |                                        |                           | like (tree) Lebanon<br>Cr-Cmp ≈8   |                                 |                                  | strike<br>Mt-A ≈13           |                  |                    |                           |                      | roots<br>Goal ≈8                  |
| 142  | 14:7a (ZYqX)   |                                   | -his<br>-Atb-Ps                              |                                        |                           |                                    |                                 |                                  | go forth<br>Mt-A ≈13         |                  |                    |                           |                      | shoots<br>Actor ≈2                |
| 143  | 14:7b (WYqX)   |                                   | -his<br>-Atb-Ps                              |                                        |                           | beauty<br>Carrier ≈8               |                                 |                                  | will be<br>Rel-A             |                  |                    |                           |                      | like-the olive tree<br>Atb-Cmp ≈8 |
| 144  | 14:7c (WNmCl)  |                                   | -his<br>-Atb-Ps                              |                                        |                           | like Lebanon<br>Atb-Cmp ≈8         |                                 |                                  | (is)<br>Rel-A                |                  |                    | fragrance<br>Carrier ≈8   |                      |                                   |
