# Supplementary material
Source: publisher figshare collection journal article supplement (https://brill.figshare.com/articles/dataset/_/26404171)
Supplement: Supplementary file 6 [file 1]

| CL # | v+ln +cl. type      | 1. YHWH (62 clauses; 69 roles) | 2. Israel, Judah (128 clauses; 156 roles) | 3 Place/Time (26 clauses; 27 roles) | 4 Work/Gain 50 (25/25) | 5 Econ, SocPoli, Status 53 (28/25)     | 6 Judgm't, Destr'ctn 82 (44/38) | 7 Relate, (dis) ass'n 65 (30/35) | 8 Right'nss, Life 62 (26/36) | 9 Sin 41 (22/19) | 10 Cult 35 (15/20) | 11 Feel, think 37 (18/19) | 12 Comme'n 23 (16/7) | 13 Nature 70 (22/48) |
|------|---------------------|--------------------------------|-------------------------------------------|-------------------------------------|------------------------|----------------------------------------|---------------------------------|----------------------------------|------------------------------|------------------|--------------------|---------------------------|----------------------|----------------------|
| 109  | 13:15a (XYqt-L)     |                                | he Actor                                  |                                     |                        | flourishes among brot Mt-A ~4 Cr-L ≈11 |                                 |                                  |                              |                  |                    |                           |                      |                      |
| 110  | 13:15b110 (ZYqX)    |                                |                                           |                                     |                        |                                        | east wind come Actor ≈13 Mt-A   |                                  |                              |                  |                    |                           |                      |                      |
| 111  | 13:15b111/c (XPtcp) | -of YHWH -Atb-Ps ≈13           |                                           | from desert Cr-L ≈6, 13             |                        |                                        | wind going up Actor, Mt-A ≈13   |                                  |                              |                  |                    |                           |                      |                      |
| 112  | 13:15d (WYqX)       |                                | -his -Atb-Ps                              |                                     |                        | spring Carrier                         | be dry Rel-A.Atb                |                                  |                              |                  |                    |                           |                      |                      |
| 113  | 13:15e (WYqX)       |                                | -his -Atb-Ps                              |                                     |                        | fountain Carrier                       | be parched Rel-A.Atb            |                                  |                              |                  |                    |                           |                      |                      |
| 114  | 13:15f'g (XYqt-L)   | he Actor ≈6/5                  |                                           |                                     |                        | treasury; all desired ve Goal, Goal    | plunders Mt-A                   |                                  |                              |                  |                    |                           |                      |                      |
