# Supplementary material
Source: publisher figshare collection journal article supplement (https://brill.figshare.com/articles/dataset/_/26404171)
Supplement: Supplementary file 7 [file 1]

| CL # | v+ln +cl. type   | 1. YHWH<br>(62 clauses; 69 roles) | 2. Israel, Judah<br>(128 clauses; 156 roles) | 3 Place/Time<br>(26 clauses; 27 roles) | 4 Work/Gain 50<br>(25/25) | 5 Econ, SocPoli, Status 53 (28/25) | 6 Judgm't, Destr'ctn 82 (44/38)              | 7 Relate, (dis) ass'n 65 (30/35) | 8 Right'nss, Life 62 (26/36) | 9 Sin 41 (22/19)                  | 10 Cult 35 (15/20)                 | 11 Feel, think 37 (18/19) | 12 Comme'n 23 (16/7)                       | 13 Nature 70 (22/48) |
|------|------------------|-----------------------------------|----------------------------------------------|----------------------------------------|---------------------------|------------------------------------|----------------------------------------------|----------------------------------|------------------------------|-----------------------------------|------------------------------------|---------------------------|--------------------------------------------|----------------------|
| 39   | 12:11a (WQt0)    | [I]<br>[Sayer]                    |                                              |                                        |                           |                                    |                                              |                                  |                              |                                   |                                    |                           | spoke to/by prophets<br>Ver, Rcvr/Agent ≈7 |                      |
| 40   | 12:11b (WXQt)    | I<br>Actor                        |                                              |                                        | multiply<br>Mt-A          |                                    |                                              |                                  |                              |                                   |                                    |                           | vision<br>Goal                             |                      |
| 41   | 12:11c (WxY0-L)  | [I]<br>[Sayer]                    |                                              |                                        |                           |                                    |                                              |                                  |                              |                                   |                                    |                           | spoke parables, by har<br>Ver, Cr-Mns ≈7   |                      |
| 42   | 12:12a (xNmCl)   |                                   |                                              | Gilead<br>Carrier ≈2                   |                           |                                    |                                              |                                  |                              | (is) wickedness<br>Rel-A, Atb ≈10 |                                    |                           |                                            |                      |
| 43   | 12:12b (xQt0)    | [they]<br>[Carrier ≈3]            |                                              |                                        |                           |                                    | become futile<br>Rel-A, Atb ≈10 ≈9           |                                  |                              |                                   |                                    |                           |                                            |                      |
| 44   | 12:12c (xQt0)    | [they]<br>[Actor]                 |                                              | in-Gilgal<br>Cr-L ≈2                   |                           |                                    |                                              |                                  |                              |                                   | sacrifice bulls<br>Mat-A, Goal ~13 |                           |                                            |                      |
| 45   | 12:12d/e (xNmCl) | -their<br>-Atb-Ps ≈3              |                                              |                                        |                           |                                    | be like stone heaps on<br>Rel-A, Atb-Cmp ≈13 |                                  |                              |                                   | altars<br>Carrier                  |                           |                                            |                      |
| 46   | 12:13a (WayX)    | Jacob<br>Actor                    |                                              | country of Aram<br>Cr-L                | fled<br>Mt-A ~5, 6        |                                    |                                              |                                  |                              |                                   |                                    |                           |                                            |                      |
| 47   | 12:13b (WayX)    | Israel<br>Actor                   |                                              |                                        | worked<br>Mt-A            | for-wife<br>Cr-Prp                 |                                              |                                  |                              |                                   |                                    |                           |                                            |                      |
| 48   | 12:13c (WxQ0)    | [he]<br>[Actor]                   |                                              |                                        | kept (sheep)<br>Mt-A ~5   | for-wife<br>Cr-Prp                 |                                              |                                  |                              |                                   |                                    |                           |                                            |                      |
