# Supplementary material
Source: publisher figshare collection journal article supplement (https://brill.figshare.com/articles/dataset/_/26404171)
Supplement: Supplementary file 8 [file 1]

| CL # | v+ln +cl. type      | 1. YHWH<br>(62 clauses; 69 roles) | 2. Israel, Judah<br>(128 clauses; 156 roles) | 3 Place/Time<br>(26 clauses; 27 roles) | 4 Work/Gain 50<br>(25/25)         | 5 Econ, SocPoli, Status 53 (28/25) | 6 Judgm't, Destr'ctn 82 (44/38) | 7 Relate, (dis) ass'n 65 (30/35) | 8 Right'nss, Life 62 (26/36) | 9 Sin 41 (22/19) | 10 Cult 35 (15/20)                           | 11 Feel, think 37 (18/19) | 12 Comme'n 23 (16/7) | 13 Nature 70 (22/48) |
|------|---------------------|-----------------------------------|----------------------------------------------|----------------------------------------|-----------------------------------|------------------------------------|---------------------------------|----------------------------------|------------------------------|------------------|----------------------------------------------|---------------------------|----------------------|----------------------|
| 59   | 13:2a59 (WxY0-L)    |                                   | [they] [Actor]                               | now Cr-T                               |                                   |                                    |                                 |                                  |                              | continue Mt-A    |                                              |                           |                      |                      |
| 60   | 13:2a60 (Co[InfC]†) |                                   | [they] [Actor]                               |                                        |                                   |                                    |                                 |                                  |                              | to sin Mt-A†     |                                              |                           |                      |                      |
| 61   | 13:2b (Way0)        |                                   | [they] for-themselve [Actor] Ben. Client     |                                        |                                   |                                    |                                 |                                  |                              |                  | make cast images Mt-A, Goal ≈9 ~4            |                           |                      |                      |
| 62   | 13:2c (Ellp)        |                                   | -their -Atb-Ps                               |                                        | according to-skill Cr-Q           |                                    | from-silver Cr-Mns              |                                  |                              |                  | idols Goal ≈9                                |                           |                      |                      |
| 63   | 13:2d (NmCl)        |                                   |                                              |                                        | (is) craftsmen-work Rel-I, Idr ~2 |                                    |                                 |                                  |                              |                  | all of it Idd                                |                           |                      |                      |
| 64   | 13:2e (xPtcp)       |                                   | they Sayer                                   |                                        |                                   |                                    |                                 |                                  |                              |                  | to-them Rcvr                                 |                           |                      |                      |
| 65   | 13:2f (XYqt-L)      |                                   |                                              |                                        |                                   |                                    |                                 |                                  |                              |                  | people-sacrificers kiss "Actor ~2 "Mt-A ≈9 % |                           | speak Ver ≈9, 10     |                      |
