# Supplementary material
Source: publisher figshare collection journal article supplement (https://brill.figshare.com/articles/dataset/_/26404171)
Supplement: Supplementary file 9 [file 1]

| CL # | v+ln +cl. type      | 1. YHWH<br>(62 clauses; 69 roles) | 2. Israel, Judah<br>(128 clauses; 156 roles) | 3 Place/Time<br>(26 clauses; 27 roles) | 4 Work/Gain 50<br>(25/25)             | 5 Econ, SocPoli, Status 53 (28/25)             | 6 Judgm't, Destr'ctn 82 (44/38) | 7 Relate, (dis) ass'n 65 (30/35) | 8 Right'nss, Life 62 (26/36) | 9 Sin 41 (22/19)                       | 10 Cult 35 (15/20) | 11 Feel, think 37 (18/19) | 12 Comme'n 23 (16/7) | 13 Nature 70 (22/48) |
|------|---------------------|-----------------------------------|----------------------------------------------|----------------------------------------|---------------------------------------|------------------------------------------------|---------------------------------|----------------------------------|------------------------------|----------------------------------------|--------------------|---------------------------|----------------------|----------------------|
| 27   | 12:8a27 (CPen↓)     |                                   | Canaan<br>↓Target ≈4                         |                                        |                                       |                                                |                                 |                                  |                              |                                        |                    |                           |                      |                      |
| 28   | 12:8a28 (NmCl)      |                                   | -his<br>-Atb-Ps                              |                                        | in-hand<br>Atb ~9                     |                                                |                                 |                                  |                              | are scales-treachery<br>Rel-A, Carrier |                    |                           |                      |                      |
| 29   | 12:8b29 (Co[InfC]↓) |                                   | [he]<br>[Actor]                              |                                        |                                       |                                                |                                 |                                  |                              | to oppress<br>↓Mt-A                    |                    |                           |                      |                      |
| 30   | 12:8b30 (xQt0)      |                                   | [he]<br>[Sensor]                             |                                        |                                       |                                                |                                 |                                  |                              |                                        |                    | loves<br>Mn-D ≈9          |                      |                      |
| 31   | 12:9a (WayX)        |                                   | Ephraim<br>Sayer                             |                                        |                                       |                                                |                                 |                                  |                              |                                        |                    |                           | said<br>Ver          |                      |
| 32   | 12:9b (xQt0)        |                                   | [I]<br>"[Carrier]                            |                                        |                                       | become rich<br>"Rel-A "Atb ≈4                  |                                 |                                  |                              |                                        |                    |                           |                      |                      |
| 33   | 12:9c (ZQt0)        |                                   | [I] for myself<br>[Actor] "Ben               |                                        | found<br>"Mt-A                        | wealth<br>"Goal                                |                                 |                                  |                              |                                        |                    |                           |                      |                      |
| 34   | 12:9d34 (CPen↓)     |                                   | -my<br>"-Atb-Ps                              |                                        | all-gain<br>↓"Target ~5               |                                                |                                 |                                  |                              |                                        |                    |                           |                      |                      |
| 35   | 12:9d35 (xYq0-L)    |                                   | in-me<br>"Cr-L                               |                                        | not incur [it]<br>"Mn-Cog "[Actor] ≈1 |                                                |                                 |                                  |                              | iniquity<br>"Goal                      |                    |                           |                      |                      |
| 36   | 12:9e (xNmCl)       |                                   |                                              |                                        |                                       |                                                |                                 |                                  |                              | {is} sin<br>"{Rel-I} "Idr              |                    |                           |                      |                      |
| 37   | 12:10a (WNmCl)      | I, YH, God<br>Rel-I, Idr, Idd     | -your                                        | from land Egypt<br>Cr-L/T-Orgn         |                                       |                                                |                                 |                                  |                              |                                        |                    |                           |                      |                      |
| 38   | 12:10b (xYq0-L)     | [I]<br>Actor                      | [you]<br>[Goal]                              | days of assembly<br>Cr-Comp ≈7         |                                       | again, make live, tents<br>Mt-A ≈6, Cr-T, Cr-Q |                                 |                                  |                              |                                        |                    |                           |                      |                      |
