# Supplementary material
Source: publisher figshare collection journal article supplement (https://brill.figshare.com/articles/dataset/_/26404171)
Supplement: Supplementary file 10 [file 1]

| CL # | v+In +cl. type  | 1. YHWH (62 clauses; 69 roles) | 2. Israel, Judah (128 clauses; 156 roles) | 3 Place/Time (26 clauses; 27 roles) | 4 Work/Gain 50 (25/25) | 5 Econ, SocPoli, Status 53 (28/25) | 6 Judgm't, Destr'tcn 82 (44/38) | 7 Relate, (dis) ass'n 65 (30/35)       | 8 Right'nss, Life 62 (26/36) | 9 Sin 41 (22/19) | 10 Cult 35 (15/20) | 11 Feel, think 37 (18/19) | 12 Commc'n 23 (16/7) | 13 Nature 70 (22/48) |
|------|-----------------|--------------------------------|-------------------------------------------|-------------------------------------|------------------------|------------------------------------|---------------------------------|----------------------------------------|------------------------------|------------------|--------------------|---------------------------|----------------------|----------------------|
| 87   | 13:9a87 (ZQt0)  | [I]<br>[Actor]                 | [you]<br>[Goal]                           |                                     |                        |                                    | destroy<br>Mt-A                 |                                        |                              |                  |                    |                           |                      |                      |
| 88   | 13:9a88 (VocT)  |                                | O Israel<br>Goal↑                         |                                     |                        |                                    |                                 |                                        |                              |                  |                    |                           |                      |                      |
| 89   | 13:9b (Ellp)    | against-me<br>Ben-Icm          | -your<br>-Atb-Ps                          |                                     |                        |                                    |                                 | {Mt-A}                                 | against-help<br>Ben-Icm ~l   |                  |                    |                           |                      |                      |
| 90   | 13:10a (NmCl)   |                                | your<br>-Atb-Ps                           | where<br>Cr-L-?                     |                        |                                    |                                 | (be) king now<br>Exist, Existent, Cr-T |                              |                  |                    |                           |                      |                      |
| 91   | 13:10b (WYq0)   |                                | [you] -your<br>[Goal] -Atb-Ps             | in all cities<br>Cr-L               |                        |                                    |                                 | [he]<br>[Actor]                        | save<br>Mt-A                 |                  |                    |                           |                      |                      |
| 92   | 13:10c92 (Ellp) |                                | -your<br>-Atb-Ps                          | {Cr-L-?}                            |                        |                                    |                                 | judges<br>{Exist} Existent             |                              |                  |                    |                           |                      |                      |
| 93   | 13:10c93 (xQt0) |                                | [you]<br>[Sayer]                          |                                     |                        |                                    |                                 |                                        |                              |                  |                    |                           |                      | say<br>Ver           |
| 94   | 13:10d (ZIm0)   | " {Rcvr}                       | [to me]<br>"[Ben]                         |                                     |                        | give<br>"Mt-A                      | king and princes<br>"Goal       |                                        |                              |                  |                    |                           |                      |                      |
