# Supplementary material
Source: publisher figshare collection journal article supplement (https://brill.figshare.com/articles/dataset/_/26404171)
Supplement: Supplementary file 11 [file 1]

| CL # | v+ln +cl. type     | 1. YHWH<br>(62 clauses; 69 roles) | 2. Israel, Judah<br>(128 clauses; 156 roles) | 3 Place/Time<br>(26 clauses; 27 roles) | 4 Work/Gain 50<br>(25/25) | 5 Econ, SocPoli, Status 53 (28/25) | 6 Judgm't, Destr'ctn 82 (44/38) | 7 Relate, (dis) ass'n 65 (30/35) | 8 Right'nss, Life 62 (26/36)                     | 9 Sin 41 (22/19)       | 10 Cult 35 (15/20) | 11 Feel, think 37 (18/19) | 12 Comme'n 23 (16/7) | 13 Nature 70 (22/48)                 |
|------|--------------------|-----------------------------------|----------------------------------------------|----------------------------------------|---------------------------|------------------------------------|---------------------------------|----------------------------------|--------------------------------------------------|------------------------|--------------------|---------------------------|----------------------|--------------------------------------|
| 154  | 14:9c (XNmCl)      | I<br>Carrier                      |                                              |                                        |                           |                                    |                                 |                                  | (am)<br>Rel-A                                    |                        |                    |                           |                      | like-luxuriant cypress<br>Atb-Cmp ≈8 |
| 155  | 14:9d (XQtI)       | from-me<br>Cr-AL                  | your<br>-Atb-Ps                              |                                        | be found<br>Mt-C          |                                    |                                 |                                  |                                                  |                        |                    |                           |                      | fruit<br>Goal ≈5, 8                  |
| 156  | 14:10a156 (AdjClI) |                                   |                                              |                                        |                           |                                    |                                 |                                  | whoever (is) wise<br>↓Carrier, Rel-A.Atb         |                        |                    |                           |                      |                                      |
| 157  | 14:10a157 (WYq0)   |                                   |                                              |                                        |                           |                                    |                                 |                                  | [he]<br>[Senser]                                 |                        |                    | understand<br>Mn-C        | these things<br>Goal |                                      |
| 158  | 14:10b158 (AdjClI) |                                   |                                              |                                        |                           |                                    |                                 |                                  | discerning (whoever is)<br>↓Atb {Rel-A, Carrier} |                        |                    |                           |                      |                                      |
| 159  | 14:10b159 (WYq0)   |                                   |                                              |                                        |                           |                                    |                                 |                                  | [he]<br>[Senser]                                 |                        |                    | know<br>Mn-C              | [them]<br>[Goal]     |                                      |
| 160  | 14:10c (AdjCl)     | -of YHWH<br>-Atb-Ps               |                                              |                                        | ways<br>Carrier ≈8        |                                    |                                 |                                  | right<br>Atb                                     |                        |                    |                           |                      |                                      |
| 161  | 14:10d (WXYq-L)    |                                   |                                              |                                        | walk<br>Mt-A              |                                    |                                 |                                  | upright in-them<br>Actor, Cr-Q                   |                        |                    |                           |                      |                                      |
| 162  | 14:10e (WXYq-L)    |                                   |                                              |                                        |                           |                                    | stumble<br>Mt-A                 |                                  | in-them<br>Cr-Reas                               | transgressors<br>Actor |                    |                           |                      |                                      |
