# Supplementary material
Source: publisher figshare collection journal article supplement (https://brill.figshare.com/articles/dataset/_/26404171)
Supplement: Supplementary file 12 [file 1]

| CL # | v+ln<br>+cl. type | 1. YHWH<br>(62 clauses; 69<br>roles)                      | 2. Israel, Judah<br>(128 clauses;<br>156 roles) | 3 Place/Time<br>(26 clauses; 27<br>roles) | 4 Work/Gain 50<br>(25/25) | 5 Econ, SocPoli,<br>Status 53 (28/25) | 6 Judgm't,<br>Destr'ctn 82<br>(44/38) | 7 Relate, (dis)<br>ass'n 65 (30/35) | 8 Right'nss, Life<br>62 (26/36) | 9 Sin 41 (22/19) | 10 Cult 35<br>(15/20) | 11 Feel, think 37<br>(18/19) | 12 Commc'n 23<br>(16/7) | 13 Nature 70<br>(22/48) |
|------|-------------------|-----------------------------------------------------------|-------------------------------------------------|-------------------------------------------|---------------------------|---------------------------------------|---------------------------------------|-------------------------------------|---------------------------------|------------------|-----------------------|------------------------------|-------------------------|-------------------------|
| 124  | 14:3a<br>(Zlm0)   | <div>to YHWH<br/>"Cr-AL</div> <div>to-him<br/>"Rcvr</div> | with-you<br>{Rcvr} "Cr-Acc                      |                                           |                           |                                       |                                       |                                     |                                 |                  | take<br>"Mt-A ~4      |                              |                         |                         |
| 125  | 14:3b<br>(WIm0)   |                                                           | {Rcvr}                                          |                                           |                           |                                       | return<br>"Mt-A                       |                                     |                                 |                  |                       |                              |                         |                         |
| 126  | 14:3c<br>(Zlm0)   |                                                           | {Rcvr}                                          |                                           |                           |                                       |                                       |                                     |                                 |                  | say<br>Ver            |                              |                         |                         |
| 127  | 14:3d<br>(xYq0-L) |                                                           | {Rcvr {Sayer}}                                  |                                           |                           |                                       |                                       | all-{}-remove<br>""Mt-A ≈7          | iniquity<br>""Goal              |                  |                       |                              |                         |                         |
| 128  | 14:3e<br>(WIm0)   |                                                           | {R... {S...}}                                   |                                           |                           |                                       | take<br>""Mt-A ≈8                     | good<br>""Goal ≈10                  |                                 |                  |                       |                              |                         |                         |
| 129  | 14:3f<br>(WYq0)   |                                                           | [we] -our<br>{R {S}} ""[Actor] "                |                                           |                           |                                       |                                       |                                     |                                 |                  | will pay<br>""Mt-A ≈7 | lips-fruit<br>""Goal ≈10     |                         |                         |
