# Supplementary material
Source: publisher figshare collection journal article supplement (https://brill.figshare.com/articles/dataset/_/26404171)
Supplement: Supplementary file 13 [file 1]

| CL # | v+ln +cl. type       | 1. YHWH (62 clauses; 69 roles) | 2. Israel, Judah (128 clauses; 156 roles) | 3 Place/Time (26 clauses; 27 roles) | 4 Work/Gain 50 (25/25) | 5 Econ, SocPoli, Status 53 (28/25) | 6 Judgm't, Destr'ctn 82 (44/38) | 7 Relate, (dis) ass'n 65 (30/35) | 8 Right'nss, Life 62 (26/36) | 9 Sin 41 (22/19) | 10 Cult 35 (15/20)                | 11 Feel, think 37 (18/19) | 12 Comme'n 23 (16/7) | 13 Nature 70 (22/48) |
|------|----------------------|--------------------------------|-------------------------------------------|-------------------------------------|------------------------|------------------------------------|---------------------------------|----------------------------------|------------------------------|------------------|-----------------------------------|---------------------------|----------------------|----------------------|
| 145  | 14:8a145 (ZYqX)      |                                | they [Actor]                              |                                     |                        |                                    | return Mt-A ≈5                  |                                  |                              |                  |                                   |                           |                      |                      |
| 146  | 14:8a146 (Co[Ptep]†) |                                | the inhabitants -his Actor† -Atb-Ps       |                                     |                        |                                    |                                 |                                  |                              |                  |                                   |                           |                      | in-shadow Cr-L ≈8    |
| 147  | 14:8b (ZYq0)         |                                | [they] [Actor]                            |                                     |                        |                                    |                                 |                                  | produce Mt-A ≈4              |                  |                                   |                           |                      | grain Goal ≈5        |
| 148  | 14:8c (WYq0)         |                                | [they] [Actor]                            |                                     |                        |                                    |                                 |                                  | blossom Mt-A ≈13             |                  |                                   |                           |                      | like-vine Cr-Cmp ≈8  |
| 149  | 14:8d (NmCl)         |                                | -his -Atb-Ps                              |                                     |                        | like Lebanon-wine Atb-Cmp ≈8       |                                 |                                  | (will be) Rel-A              |                  |                                   | fame Carrier ≈8           |                      |                      |
| 150  | 14:9a150 (Voct↓)     | {Sayer}                        | O Ephraim ↓Revr                           |                                     |                        |                                    |                                 |                                  |                              |                  |                                   |                           |                      |                      |
| 151  | 14:9a151 (NmCl)      | to-me Cr-View                  |                                           | anymore Cr-D                        |                        |                                    |                                 |                                  |                              |                  | (are) what idols Rel-I, Idr-? Idd |                           |                      |                      |
| 152  | 14:9b152 (XQtl)      | I Actor                        |                                           |                                     |                        |                                    | answer Mt-A ≈8                  |                                  |                              |                  |                                   |                           |                      |                      |
| 153  | 14:9b153 (WYq0)      | [I] [Actor]                    | [him] [Goal]                              |                                     |                        |                                    |                                 |                                  | watch over Mt-A ≈7           |                  |                                   |                           |                      |                      |
