# Supplementary material
Source: publisher figshare collection journal article supplement (https://brill.figshare.com/articles/dataset/_/26404171)
Supplement: Supplementary file 14 [file 1]

| CL # | v+ln +cl. type           | 1. YHWH<br>(62 clauses; 69 roles) | 2. Israel, Judah<br>(128 clauses; 156 roles) | 3 Place/Time<br>(26 clauses; 27 roles) | 4 Work/Gain 50<br>(25/25) | 5 Econ, SocPoli, Status 53 (28/25) | 6 Judgm't, Destr'ctn 82 (44/38) | 7 Relate, (dis) ass'n 65 (30/35) | 8 Right'nss, Life 62 (26/36) | 9 Sin 41 (22/19) | 10 Cult 35 (15/20)                  | 11 Feel, think 37 (18/19) | 12 Comme'n 23 (16/7)              | 13 Nature 70 (22/48) |
|------|--------------------------|-----------------------------------|----------------------------------------------|----------------------------------------|---------------------------|------------------------------------|---------------------------------|----------------------------------|------------------------------|------------------|-------------------------------------|---------------------------|-----------------------------------|----------------------|
| 130  | 14:4a<br>(XYqt-L)        |                                   | us<br>{R{S}} ""Goal                          |                                        |                           | Assyria<br>""Actor                 |                                 | not save<br>""Mt-A ≈5            |                              |                  |                                     |                           |                                   |                      |
| 131  | 14:4b<br>(xYq0-L)        |                                   | [we]<br>{R{S}} ""[Actor]                     |                                        | not ride<br>""Mt-A ≈5     | on-horses<br>""Cr-Mns              |                                 |                                  |                              |                  |                                     |                           |                                   |                      |
| 132  | 14:4c132<br>(WxY0-L)     |                                   | [we]<br>{R{S}} ""[Sayer]                     |                                        |                           |                                    |                                 |                                  |                              |                  |                                     |                           | not say anymore<br>""Ver ""Cr-Dur |                      |
| 133  | 14:4c133<br>(Co[NmCl]↑   |                                   | -our<br>{R{S}} ""-Atb-Ps                     |                                        |                           |                                    |                                 |                                  |                              |                  | gods!<br>↑""Rel-I {""Idd} ""        |                           |                                   |                      |
| 134  | 14:4c134<br>(aj[PP]↑132) |                                   | -our<br>{R{S}} ""-Atb-Ps                     |                                        |                           |                                    |                                 |                                  |                              |                  | to work -of hands<br>↑ Target ≈4, 5 |                           |                                   |                      |
| 135  | 14:4d<br>(xYqX-L)        | by you<br>""Cr-Mns                | orphan<br>{R{S}} Goal.Under                  |                                        |                           |                                    |                                 | be pitied<br>""Mn-E ≈11, 7       |                              |                  |                                     |                           |                                   |                      |
