# Supplementary material
Source: publisher figshare collection journal article supplement (https://brill.figshare.com/articles/dataset/_/26404171)
Supplement: Supplementary file 15 [file 1]

| CL # | v+ln +cl. type  | 1. YHWH (62 clauses; 69 roles) | 2. Israel, Judah (128 clauses; 156 roles) | 3 Place/Time (26 clauses; 27 roles) | 4 Work/Gain 50 (25/25) | 5 Econ, SocPoli, Status 53 (28/25) | 6 Judgm't, Destr'ctn 82 (44/38) | 7 Relate, (dis) ass'n 65 (30/35) | 8 Right'nss, Life 62 (26/36) | 9 Sin 41 (22/19) | 10 Cult 35 (15/20)      | 11 Feel, think 37 (18/19)       | 12 Comme'n 23 (16/7) | 13 Nature 70 (22/48) |
|------|-----------------|--------------------------------|-------------------------------------------|-------------------------------------|------------------------|------------------------------------|---------------------------------|----------------------------------|------------------------------|------------------|-------------------------|---------------------------------|----------------------|----------------------|
| 49   | 12:14a (WxQX)   | YHWH Actor                     | Israel Goal                               | from Egypt Cr-L ≈6, 5               |                        |                                    | brought up Mt-A ≈5              |                                  |                              |                  |                         |                                 | by-prophet Cr-Mns ~7 |                      |
| 50   | 12:14b (WxQ0)   |                                | [he] [Goal]                               |                                     |                        |                                    | was kept Mt-A ≈5                |                                  |                              |                  |                         |                                 | by prophet Cr-Mns ~7 |                      |
| 51   | 12:15a (ZQ0X)   |                                | Ephraim Bhvr                              |                                     |                        |                                    | provoked Beh ≈9, ~11            |                                  |                              |                  |                         | bitter(ly) Cr-Q ≈9              |                      |                      |
| 52   | 12:15b (WxY0-L) | [he] [Actor]                   | upon him -his Ben-Icm, Atb-Ps             |                                     |                        | leaves Mt-A                        |                                 |                                  | bloodguilt Goal              |                  |                         |                                 |                      |                      |
| 53   | 12:15c (WxYX-L) | his lord Actor                 | to him -his Ben-Icm, Atb-Ps               |                                     |                        | returns Mt-A                       |                                 |                                  | reproach Goal                |                  |                         |                                 |                      |                      |
| 54   | 13:1a54 (InfC1) |                                | Ephraim Actor                             |                                     |                        |                                    |                                 |                                  |                              |                  |                         |                                 | when-spoke ↓Ver      |                      |
| 55   | 13:1a55 (NmCl)  |                                |                                           |                                     |                        |                                    |                                 |                                  |                              |                  |                         | (was) trembling Existent, Exist |                      |                      |
| 56   | 13:1b (ZQ0X)    | he Actor                       | in-Israel Cr-L                            |                                     | exalt Mn-C ≈11         |                                    |                                 |                                  |                              |                  |                         |                                 |                      |                      |
| 57   | 13:1c57 (Way0)  | [he] [Carrier]                 |                                           |                                     |                        |                                    |                                 |                                  | be(came) guilty Rel-A Atb    |                  | through Baal Cr-Reas ≈9 |                                 |                      |                      |
| 58   | 13:1c58 (Way0)  | [he] [Goal.Undergoer]          |                                           |                                     |                        | died Mt-E                          |                                 |                                  |                              |                  |                         |                                 |                      |                      |
