# Supplementary material
Source: publisher figshare collection journal article supplement (https://brill.figshare.com/articles/dataset/_/26404171)
Supplement: Supplementary file 16 [file 1]

| CL # | v+ln +cl. type   | 1. YHWH (62 clauses; 69 roles) | 2. Israel, Judah (128 clauses; 156 roles) | 3 Place/Time (26 clauses; 27 roles) | 4 Work/Gain 50 (25/25) | 5 Econ, SocPoli, Status 53 (28/25) | 6 Judgm't, Destr'ctn 82 (44/38)   | 7 Relate, (dis) ass'n 65 (30/35) | 8 Right'nss, Life 62 (26/36) | 9 Sin 41 (22/19) | 10 Cult 35 (15/20) | 11 Feel, think 37 (18/19) | 12 Comme'n 23 (16/7) | 13 Nature 70 (22/48) |
|------|------------------|--------------------------------|-------------------------------------------|-------------------------------------|------------------------|------------------------------------|-----------------------------------|----------------------------------|------------------------------|------------------|--------------------|---------------------------|----------------------|----------------------|
| 13   | 12:4a (xQ0)      |                                | [he] brother -his [Actor] Goal Atb-Ps     | womb Cr-T                           | grasps Mt-A ~7         |                                    |                                   |                                  |                              |                  |                    |                           |                      |                      |
| 14   | 12:4b (WxQ0)     | with-God Ben-lcm               | [he] -his [Actor] -Atb-Ps                 | power Cr-T                          | strives Mt-A ~7        |                                    |                                   |                                  |                              |                  |                    |                           |                      |                      |
| 15   | 12:5a15 (Way0)   | against an angel Ben-lcm       | [he] [Actor]                              |                                     | strove Mt-A            |                                    |                                   |                                  |                              |                  |                    |                           |                      |                      |
| 16   | 12:5a16 (Way0)   |                                | [he] [Actor]                              |                                     | prevailed Mt-A ~7, 8   |                                    |                                   |                                  |                              |                  |                    |                           |                      |                      |
| 17   | 12:5b17 (ZQ0)    |                                | [he] [Bhvr]                               |                                     |                        |                                    |                                   |                                  |                              |                  |                    | weeps Bhv                 |                      |                      |
| 18   | 12:5b18 (Way0)   | of him Cr-AL (/2)              | [he] [Actor]                              |                                     |                        |                                    | sought favor Mt-A ~8              |                                  |                              |                  |                    |                           |                      |                      |
| 19   | 12:5c (xYq0-L)   | [he] [Actor]                   | [us] [Goal]                               | Bethel Cr-L                         | finds Mt-A             |                                    |                                   |                                  |                              |                  |                    |                           |                      |                      |
| 20   | 12:5d (WxY0-L)   | [he] [Sayer]                   | with-us Rcvr                              | there Cr-L                          |                        |                                    |                                   |                                  |                              |                  |                    |                           | speaks Ver           |                      |
| 21   | 12:6a (WCPen1)   | YH God of armies 1Idd          |                                           |                                     |                        |                                    |                                   |                                  |                              |                  |                    |                           |                      |                      |
| 22   | 12:6b (NmCl)     | YHWH -his Idd -Atb-Ps          |                                           |                                     |                        |                                    |                                   |                                  |                              |                  |                    | memorial Rel-I, Idr       |                      |                      |
| 23   | 12:7a23 (CPen1)  |                                | you 1"Rcvr                                |                                     |                        |                                    |                                   |                                  |                              |                  |                    |                           |                      |                      |
| 24   | 12:7a24 (xYq0-L) | to-God {Sayer} "Cr-AL          | {Rcvr}                                    |                                     |                        |                                    | return "Mt-A                      |                                  |                              |                  |                    |                           |                      |                      |
| 25   | 12:7b (xIm0)     |                                | {Rcvr}                                    |                                     |                        |                                    | keep love "Mt-A, "Goal ~8         | justice "Goal ~7                 |                              |                  |                    |                           |                      |                      |
| 26   | 12:7c (WIm0)     | for-God "Cr-Prp                | -your {Rcvr} "-Atb-Ps                     |                                     |                        |                                    | wait continually "Mt-A, "Cr-D ~11 |                                  |                              |                  |                    |                           |                      |                      |
