# Supplementary material
Source: publisher figshare collection journal article supplement (https://brill.figshare.com/articles/dataset/_/26404171)
Supplement: Supplementary file 17 [file 1]

| CL # | v+ln +cl. type    | 1. YHWH<br>(62 clauses; 69 roles) | 2. Israel, Judah<br>(128 clauses; 156 roles) | 3 Place/Time<br>(26 clauses; 27 roles) | 4 Work/Gain 50<br>(25/25) | 5 Econ, SocPoli, Status 53 (28/25) | 6 Judgm't, Destr'ctn 82 (44/38)    | 7 Relate, (dis) ass'n 65 (30/35) | 8 Right'nss, Life 62 (26/36) | 9 Sin 41 (22/19) | 10 Cult 35 (15/20) | 11 Feel, think 37 (18/19)            | 12 Comme'n 23 (16/7) | 13 Nature 70 (22/48) |
|------|-------------------|-----------------------------------|----------------------------------------------|----------------------------------------|---------------------------|------------------------------------|------------------------------------|----------------------------------|------------------------------|------------------|--------------------|--------------------------------------|----------------------|----------------------|
| 102  | 13:14a (xYq0-L)   | [I]<br>[Actor]                    | [them]<br>[Goal]                             |                                        |                           |                                    | from Sheol-power<br>Cr-AL          | ransom<br>Mt-A ~8                |                              |                  |                    |                                      |                      |                      |
| 103  | 13:14b (xYq0-L)   | [I]<br>[Actor]                    | [them]<br>[Goal]                             |                                        |                           |                                    | from Death<br>Cr-AL                | redcem<br>Mt-A ~8                |                              |                  |                    |                                      |                      |                      |
| 104  | 13:14c104 (NmCl)  | {Sayer}                           |                                              | where<br>"Cr-L-?                       |                           |                                    | (are) plagues<br>"Exist, "Existent |                                  |                              |                  |                    |                                      |                      |                      |
| 105  | 13:14c105 (Voct†) |                                   |                                              |                                        |                           |                                    | O Death<br>"Rcvr†                  |                                  |                              |                  |                    |                                      |                      |                      |
| 106  | 13:14d106 (NmCl)  | {Sayer}                           |                                              | where<br>"Cr-L-?                       |                           |                                    | (are) sting<br>"Exist, "Existent   |                                  |                              |                  |                    |                                      |                      |                      |
| 107  | 13:14d107 (Voct†) |                                   |                                              |                                        |                           |                                    | O Sheol<br>"Rcvr†                  |                                  |                              |                  |                    |                                      |                      |                      |
| 108  | 13:14e (XYqt-L)   | -my<br>-Atb-Ps                    |                                              |                                        |                           |                                    |                                    |                                  | compassion<br>Phenom         |                  |                    | hidden from-eyes<br>Mn-P, Cr-View ~8 |                      |                      |
