# Supplementary material
Source: publisher figshare collection journal article supplement (https://brill.figshare.com/articles/dataset/_/26404171)
Supplement: Supplementary file 18 [file 1]

| CL # | v+ln +cl. type  | 1. YHWH<br>(62 clauses; 69 roles) | 2. Israel, Judah<br>(128 clauses; 156 roles) | 3 Place/Time<br>(26 clauses; 27 roles) | 4 Work/Gain 50<br>(25/25) | 5 Econ, SocPoli, Status 53 (28/25) | 6 Judgm't, Destr'ctn 82 (44/38) | 7 Relate, (dis) ass'n 65 (30/35) | 8 Right'nss, Life 62 (26/36) | 9 Sin 41 (22/19) | 10 Cult 35 (15/20) | 11 Feel, think 37 (18/19)      | 12 Comme'n 23 (16/7) | 13 Nature 70 (22/48)           |
|------|-----------------|-----------------------------------|----------------------------------------------|----------------------------------------|---------------------------|------------------------------------|---------------------------------|----------------------------------|------------------------------|------------------|--------------------|--------------------------------|----------------------|--------------------------------|
| 95   | 13:11a (ZYq0)   | [I] -my [Actor] -Atb-Ps ~11       | to-you [Ben]                                 |                                        |                           | king Goal                          | gave Mt-A                       |                                  |                              |                  |                    | in anger Cr-Reas ≈6            |                      |                                |
| 96   | 13:11b (WYq0)   | [I] -my [Actor] -Atb-Ps ~11       |                                              |                                        |                           | {Goal}                             | took away Mt-A                  |                                  |                              |                  |                    | in wrath Cr-Reas ≈6            |                      |                                |
| 97   | 13:12a (PtcpX)  |                                   | -(of) Ephraim -Atb-Ps ~9                     |                                        |                           |                                    | bound up Rel-A.Atb ~11          |                                  |                              | iniquity Carrier |                    |                                |                      |                                |
| 98   | 13:12b (PtcpX)  |                                   | -his -Atb-Ps ~9                              |                                        |                           |                                    | stored up Rel-A.Atb ~11         |                                  |                              | sin Carrier      |                    |                                |                      |                                |
| 99   | 13:13a (XYqt-L) |                                   | -for him Cr-Purp/Reas                        | the pangs of birth Actor ≈13 ~6        |                           |                                    | come Mt-A                       |                                  |                              |                  |                    |                                |                      |                                |
| 100  | 13:13b (XNmCl)  |                                   | he Carrier                                   |                                        |                           |                                    |                                 |                                  |                              |                  |                    | (is) unwise son {Rel-A} Atb ≈9 |                      |                                |
| 101  | 13:13c (xYq0-L) |                                   | [he] [Actor]                                 | at the right time Cr-T ≈13 ~6          |                           |                                    |                                 | does not stand Mt-A ≈6, 13       |                              |                  |                    |                                |                      | at children opening Cr-L ~7, 8 |
