# Supplementary material
Source: publisher figshare collection journal article supplement (https://brill.figshare.com/articles/dataset/_/26404171)
Supplement: Supplementary file 19 [file 1]

| CL # | v+ln +cl. type    | 1. YHWH<br>(62 clauses; 69 roles) | 2. Israel, Judah<br>(128 clauses; 156 roles) | 3 Place/Time<br>(26 clauses; 27 roles) | 4 Work/Gain 50<br>(25/25) | 5 Econ, SocPoli, Status 53 (28/25) | 6 Judgm't, Destr'ctn 82 (44/38)         | 7 Relate, (dis) ass'n 65 (30/35) | 8 Right'nss, Life 62 (26/36) | 9 Sin 41 (22/19) | 10 Cult 35 (15/20) | 11 Feel, think 37 (18/19) | 12 Comme'n 23 (16/7) | 13 Nature 70 (22/48)                |
|------|-------------------|-----------------------------------|----------------------------------------------|----------------------------------------|---------------------------|------------------------------------|-----------------------------------------|----------------------------------|------------------------------|------------------|--------------------|---------------------------|----------------------|-------------------------------------|
| 81   | 13:7a<br>(Way0)   | [I]<br>[Carrier]                  | to-them<br>Ben-lcm                           |                                        |                           |                                    | was<br>Rel-A ≈13                        |                                  |                              |                  |                    |                           |                      | like-lion<br>Atb-Cmp ≈6             |
| 82   | 13:7b<br>(xYq0-L) | [I]<br>[Actor]                    |                                              | on-the road<br>Cr-L ≈4                 |                           |                                    | lurk<br>Mt-A ≈13                        |                                  |                              |                  |                    |                           |                      | like-leopard<br>Atb-Cmp ≈6          |
| 83   | 13:8a<br>(ZYq0)   | [I]<br>[Actor]                    | [them]<br>[Goal]                             |                                        |                           |                                    | attack<br>Mt-A ≈13                      |                                  |                              |                  |                    |                           |                      | like-bear bereaved<br>Atb-Cmp ≈6    |
| 84   | 13:8b<br>(WYq0)   | I<br>[Actor]                      | heart covering -their<br>Goal ≈11 -Atb-Ps    |                                        |                           |                                    | tear open<br>Mt-A ≈13                   |                                  |                              |                  |                    |                           |                      |                                     |
| 85   | 13:8c<br>(WYq0)   | [I]<br>[Actor]                    | [them]<br>[Goal]                             | there<br>Cr-L                          |                           |                                    | devour<br>Mt-A ≈13                      |                                  |                              |                  |                    |                           |                      | like-lion<br>Atb-Cmp ≈6             |
| 86   | 13:8d<br>(XYqt-L) |                                   | [them]<br>[Goal]                             |                                        |                           |                                    | [she] rip to shreds<br>[Actor] Mt-A ≈13 |                                  |                              |                  |                    |                           |                      | (as) animal-of fields<br>Atb-Cmp ≈6 |
